# Supplementary material
Source: Springer Nature journal article supplement (https://www.springermedizin.de/resource/supplementary/13054_2009_8306_MOESM2_ESM.pdf/9731668)

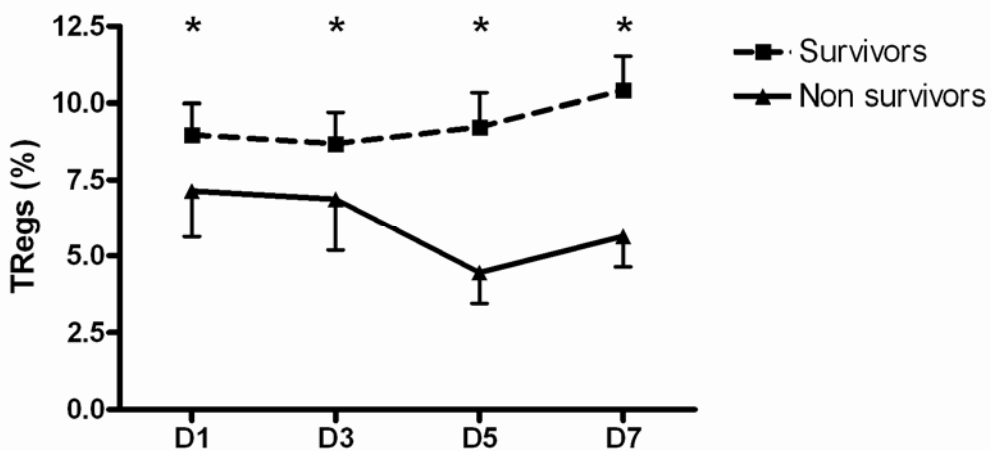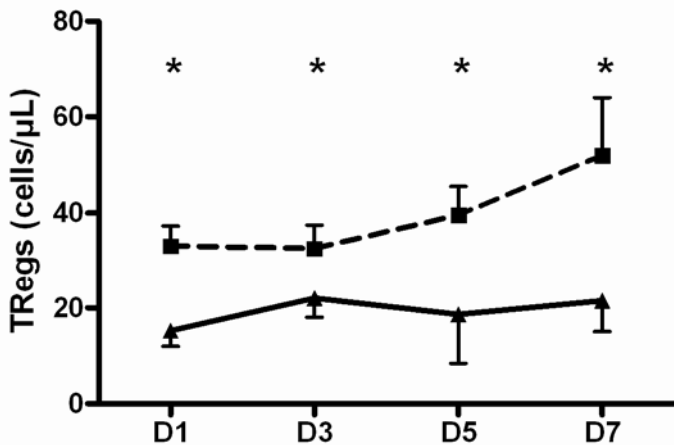

Subject at risk

|               |    |    |    |   |
|---------------|----|----|----|---|
| Survivors     | 15 | 15 | 13 | 9 |
| Non survivors | 11 | 9  | 6  | 4 |

Supplement: MOESM2 [file 9731668]
